# Null point of discrimination in crustacean polarisation vision

Martin J. How, John Christy, Nicholas W. Roberts and N. Justin Marshall

Supplementary information

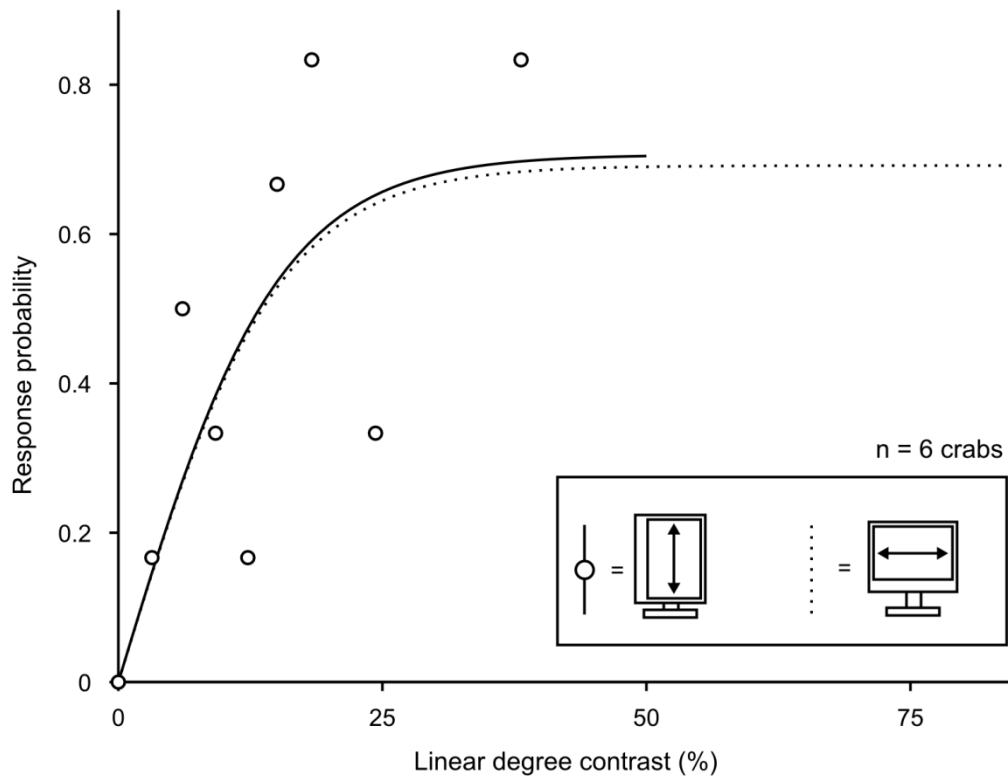

Supplementary figure 1: **Response probability of fiddler crabs to vertically oriented stimuli.** Circles represent the proportion of crabs ( $n=6$ ) responding to a particular degree contrast, with e-vector oriented at 90 (vertical). Solid line is the fitted hyperbolic tangent to the data. Dotted line is the fitted hyperbolic tangent to the horizontal stimulus data presented in figure 1 of the main manuscript. Experimental methods as described in main manuscript.
